# Supplementary material for: The multiphoton photochemistry of 2-iodooctane in methanolElectronic supplementary information (ESI) available: experimental details and methodological results on the determination of the power dependence and F. See http://www.rsc.org/suppdata/cc/b3/b302814n/
Source: Royal Society of Chemistry journal article supplement (doi:10.1039/b302814n), 2003-01-01
Supplement: b302814n.doc [file b302814n.doc]

**The Multiphoton Photochemistry of 2-Iodooctane in Methanol**

By

Fang, Gao, Robert N. Compton, and Richard M. Pagni

**Supporting Material**

**Experimental Procedures**. The details for carrying out the one-photon photochemistry of 2-iodooctane are found in reference 1. The multiphoton photochemistry was initiated with the unfocussed 4th harmonic light from a Nd-YAG laser operating at 10 Hz. The photochemistry was carried out in degassed, vigorously stirred 1-cm quartz cells. Product identification and quantification were determined by gc/ms. The power was measured with a power meter.

**Intensity Dependence**. If the absorbance by a solution undergoing a one-photon photochemical reaction is small, the rate expression for the disappearance of substrate is2

where c is the concentration of substrate, k is a phenomenological rate constant, and Iex is the incident photon flux. For a multiphoton reaction the expression becomes

Solution of the differential equation yields

where n equals the number of photons required for the reaction to occur. To determine the

power dependence of the reaction, one irradiates a series of solutions with a common initial

concentration of substrate (co) for a constant period of time (20 min) but varying the power from

experiment to experiment. A plot of vs lnIex will yield a straight line with slope = n.

The data are presented in the following table.

Table 1. Power dependence on the photolysis of 2-iodooctane in methanola

recovered

experiment power (mJ pulse-1) 2-iodooctane (%)

1 0.82 98.2

2 2.63 76.3

3 4.11 47.6

4 4.30 44.8

5 5.83 11.1

(a) Initial concentration = 2.56 x 10-2 M. Reactions were run for 20 minutes.

A plot of versus lnIex yields a straight line with a slope (n) = 2.38  0.07.

There are three plausible reasons why n may not be an integer: (1) There are competing multiphoton processes, each with a different value of n. (2) There is an improper match of the cell length and the length of the solution being exposed to the light. In the intense laser field, a small fraction of the solution may absorb all of the photons and yet all of the solution is being analyzed for unreacted substrate. (3) The indirect method of following the reaction used here may introduce error into the value of n.

Under different circumstances a photochemical reaction may be zero order in c. For a multiphoton photoreaction the differential equation becomes

This yields the solution

A plot of ln(co-c) vs lnIex will yield a straight line with slope n. The data in Table 1 do not yield a straight line by plotting ln(co-c) vs InIex. Thus, the photoreaction of 2-iodooctane in methanol is not zero order.

**Determination of F**. The methodology for determining F is found in the Supporting Material in reference 1. The fact that the ee of recovered 2-iodooctane remains close to 1 means that F is very close to 1.

References:

1. Gao, F.; Boyles, D.; Sullivan, R.; Compton, R. N.; Pagni, R. M. *J. Org. Chem.* **2002**, *67*, 9361.
2. (a) Mauser, H.; Gauglitz, G. *Photokinetics-Theoretical Fundamentals and Applications* in Comprehensive Chemical Kinetics; Vol. 36; Compton, R. G.; Hancock, G. Eds.; Elsevier: Amsterdam, 1998, p. 1. (b) Nakamura, a.; Nishino, H.; Inoue, Y. *Perkin 2*, **2001**, 1701.
